# Supplementary material for: Identifying Important Features for Downscaling Soil Moisture to 1-km in the Contiguous United States
Source: Copernicus journal article supplement (doi:10.5194/egusphere-2025-896), 2025-04-07
Supplement: Supplementary file [file egusphere-2025-896-RC2-supplement.pdf]

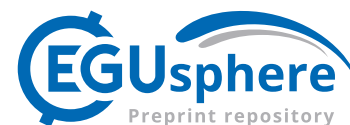

<sup>2</sup>Climate Science in the School of Natural Resources, University of Missouri, Columbia, MO

\*Corresponding author address: Eshita A. Eva, Department of Geography, The Ohio State University, 1145 Derby Hall, 154 N Oval Mall, Columbus, OH 43210  
E-mail: [evaeshita22@gmail.com](mailto:evaeshita22@gmail.com)

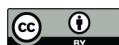

## 13 Abstract

14 Soil moisture is a fundamental state variable in climatology, meteorology, and hydrology. Many  
15 of the available soil moisture products have a coarse spatial resolution that is not useful for  
16 agricultural applications. This study used Random Forest to identify which features are most  
17 helpful for accurately downscaling soil moisture to 1-km resolution. Fourteen features were  
18 considered: precipitation, antecedent precipitation index, maximum daily air temperature,  
19 minimum daily air temperature, mean daily air temperature, diurnal temperature range, dew  
20 point temperature, elevation, slope, aspect, normalized difference vegetation index, leaf area  
21 index (LAI), soil texture, and land use/land cover. The analysis of variable importance was  
22 repeated using two different sources of soil moisture data (e.g., satellite-derived soil moisture  
23 from NASA's Soil Moisture Active Passive (SMAP) and model-derived soil moisture from the  
24 North American Land Assimilation System (NLDAS)) and ~~two different ways of representing~~  
25 ~~soil saturation (e.g., volumetric water content (VWC) and percentiles).~~ We found that dew point  
26 temperature **is** the most important variable for downscaling SMAP percentiles (**0.18**), NLDAS  
27 VWC (0.27), and NLDAS percentiles (0.17) over CONUS, while elevation is the most important  
28 variable for downscaling SMAP VWC (0.28). Dew point temperature is crucial for downscaling  
29 in most regions of the United States, except in the South and **WestNorthCentral**, where elevation  
30 is the most important feature. The accuracy of the downscaling varies by region. In the South,  
31 SMAP VWC and NLDAS VWC downscaling are relatively accurate, both have mean absolute  
32 errors of ~0.07. The MAE values in the South region are **0.196** for SMAP percentiles and 0.175  
33 for NLDAS percentiles.

34 **Keywords:** Soil moisture, downscaling, SMAP, NLDAS, Random Forest

35



## 36      **1. Introduction**

37            Soil moisture is an important state variable in the climate system. Soil moisture is  
38    essential for examining, monitoring, and forecasting drought and streamflow (Abbaspour et al.  
39    2015; Keesstra et al. 2016), hydrological parameter distribution (Carrijo et al. 2019; Dobriyal et  
40    al. 2012; Pittelkow et al. 2015), flash flood management (Brocca et al. 2014; Wanders et al.  
41    2014), drought (Ruosteenoja et al. 2020; Wagner et al. 2013) and weather forecasting  
42    (Seneviratne et al. 2010; Zhang et al. 2019). Soil moisture is also important for agriculture. It  
43    influences crop yield, irrigation planning, disease outbreaks, pest control, and determining  
44    optimal management practices, including irrigation (Dobriyal et al. 2012; Pittelkow et al. 2015).

45            Soil moisture is a small constituent of the total available freshwater (0.0015%) and the  
46    global water cycle (0.05%) (Robinson et al. 2008). However, soil moisture is a critical element  
47    of land-atmosphere interactions because it plays a significant role in modulating exchanges of  
48    water between the land and atmosphere through evapotranspiration and transpiration (Ford et al.  
49    2016; Zhang et al. 2019). Processes such as evapotranspiration, runoff, infiltration, and  
50    groundwater recharge are influenced by the soil moisture and so it also has a significant part to  
51    play in the hydrologic cycle (Vereecken et al. 2008).

52            Although soil moisture is useful for many purposes, national soil moisture data are not  
53    readily available at high resolution (e.g., kilometer scale). For example, satellite soil moisture  
54    products are limited to 1-km spatial resolution and model-derived products are limited to 12.5-  
55    km, therefore often it is not sufficient for field-scale applications in the agricultural sector. To  
56    make these datasets applicable to the finer scale, downscaling is necessary. It is possible to  
57    conduct soil moisture downscaling in different ways. To assess soil moisture heterogeneity at a  
58    finer scale, one approach is to combine ancillary data with low-resolution soil moisture

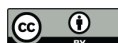

estimates. This has been implemented in several studies to obtain soil moisture at high spatial resolution (Alemohammad et al. 2018; Srivastava et al. 2013). The spatial heterogeneity of soil moisture is influenced by numerous factors, such as topography, precipitation, temperature, soil texture, and vegetation. The purpose of this study is to identify which variables are most important for downscaling soil moisture to 1-km spatial resolution. We downscaled SMAP and NLDAS using Random Forest. We compared the importance of the ancillary variables for two different data sources and two different methods for representing soil moisture (e.g., percentiles and volumetric water content). To the best of our knowledge, this is the first study to evaluate feature importance over CONUS using both satellite-derived and modeled soil moisture.

## 2. Data

### 2.1 Soil moisture data

#### 2.1.1 In-situ soil moisture

In-situ datasets are useful for calibration and validation of the SMAP and NLDAS soil moisture. In-situ measurements of soil moisture were used to validate the results of the downscaling approach. The in-situ measurement of soil moisture is based on sensors installed in various national and state networks. The networks used in this study include: the U.S. Climate Reference Network (CRN), Delaware Environmental Observing System (DEOS), North Carolina Environment and Climate Observing Network (ECONet), Illinois Climate Network (ICN), Kansas Mesonet (KS Mesonet), New Jersey Weather and Climate Network (NJWCN), NOAA Hydrometeorological Testbed (NOAA), New York Mesonet (NY Mesonet), Oklahoma Mesonet (OK Mesonet), Soil Climate Analysis Network (SCAN), South Dakota Mesonet (SD Mesonet), Snowpack Telemetry (SNOTEL), Texas Soil Observation Network (TxSon), Georgia Automated Environmental Monitoring Network (GA AEMN), and West Texas Mesonet (WTX Mesonet). A

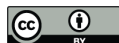

82 total of 1542 in-situ stations were used for this study. The number of stations varies from region  
83 to region greatly. For example, the South has a lot of stations, while the NorthWest has few  
84 stations. In-situ data from 2001 to 2021 were used for validating the downscaled soil moisture.

### 85 **2.1.2 SMAP soil moisture**

86 Remote sensing data provides gridded products instead of point-based soil moisture  
87 measurements and improves spatial coverage. Ford and Quiring (2019) examined the remote  
88 sensing soil moisture datasets provided by SMAP (SMAP L3 and SMAP L4), SMOS, and ESA-  
89 CCI and they concluded that SMAP Level 3 products consistently performed best among the  
90 four datasets. Though SMAP L3 products perform better than other remote sensing products, it  
91 has a significant number of missing values and dates. For that reason, SMAP L4 data are used in  
92 this study. The SMAP L4 ~~product is a~~ model-derived value-added products of surface and root  
93 zone soil moisture that support key SMAP applications. SMAP produces **Level 4 data** products  
94 that combine surface observations with a land surface model using a data assimilation system to  
95 simulate root zone soil moisture. The SMAP L4 data are available from 2015 to the present and  
96 they provide surface soil moisture (0-5 cm) and root zone soil moisture (0-100 cm). This study  
97 used **SMAP data from 2015 to 2021**.

### 98 **2.1.3 NLDAS soil moisture**

99 Land surface models use climate inputs and parameterizations of the environment to  
100 simulate soil moisture based on model-derived equations and assumptions. The model-derived  
101 soil moisture products can be achieved consistently at the global scale because the model can be  
102 operated seamlessly. However, model-simulated soil moisture has limitations because there is a  
103 nonlinear relationship between climate parameters and soil water content. In addition, soils and



104 vegetation are spatially heterogeneous and this is not accurately captured by models (Xia et al.  
105 2015). Ford and Quiring (2019) examined the NLDAS-2 and found that it performed better than  
106 the CPC-modeled soil moisture when validated against in-situ measurements. Therefore, this  
107 study uses NLDAS-2 model-simulated soil moisture. The soil moisture data are provided hourly  
108 at 1/8° spatial resolution by the NLDAS-2 Noah model. The data are available at four soil layers:  
109 0-10 cm, 10-40 cm, 40-100 cm, and 100-200 cm. To align the temporal granularity with in-situ  
110 and satellite data, we averaged the hourly data to daily. NLDAS-2 data from 2001 to 2021 were  
111 used in this study. The downscaling was done every day from 2001 to 2021 within the CONUS  
112 to generate a 1-km soil moisture from NLDAS-2.

## 113 2.2 Ancillary variables

114 This study evaluated a total of 14 features: precipitation, antecedent precipitation index,  
115 maximum daily air temperature, minimum daily air temperature, mean daily air temperature,  
116 diurnal temperature range, dew point temperature, elevation, slope, aspect, Normalized  
117 Difference Vegetation Index, Leaf Area Index, soil texture, and land use/land cover.

118 Soil texture (sand, silt, and clay percentage) came from the gridded soil survey  
119 geographic database (SSURGO) provided by Natural Resources Conservation Services (NRCS)  
120 (<https://www.nrcs.usda.gov/>). It has a spatial resolution of 10-30 m. Precipitation, mean  
121 temperature, maximum temperature, minimum temperature, and dew point temperature were  
122 obtained from Parameter-elevation Regressions on the Independent Slopes Model (PRISM) lab  
123 (<https://prism.oregonstate.edu/>). The spatial resolution of PRISM is 4-km. The Antecedent  
124 Precipitation Index (API) was calculated from the precipitation data for each day. The antecedent  
125 precipitation index (API) formula is,



126 
$$API = P_i * N * 0.98$$

127 where:  $P_i$ : daily precipitation  $i$  days before a storm,  $N$ : total number of days to consider before  
128 the storm,  $K$ : a recession constant that is less than 1.0 (here, a value of 0.98 was used).

129 The diurnal temperature range (DTR) was calculated based on the difference between the  
130 maximum to minimum temperature. Elevation data were extracted from GTOPO30 provided by  
131 the United States Geological Survey (USGS), and the spatial resolution is 1-km. Slope and  
132 aspect were derived from the elevation data. The Normalized Difference Vegetation Index  
133 (NDVI) and Leaf Area Index (LAI) are from the Advanced Very High-Resolution Radiometer  
134 (AVHRR) satellite. The spatial resolution of the AVHRR satellite is 9-km. Land use data were  
135 collected from the National Land Cover Dataset (NLCD). The native spatial resolution of NLCD  
136 is 30-m. Table 1 provides a description of all of the ancillary variables.

137 Table 1: Spatial and temporal resolution of variables evaluated for downscaling soil moisture

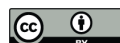

| Variable Name                                            | Temporal Domain         | Temporal Resolution | Spatial Resolution | Source                                                                           |
|----------------------------------------------------------|-------------------------|---------------------|--------------------|----------------------------------------------------------------------------------|
| Elevation                                                | 2018                    | N/A                 | 1-km               | USGS EROS Archive - Digital Elevation - Global 30 Arc-Second Elevation (GTOPO30) |
| Slope                                                    | 2018                    | N/A                 | 1-km               | USGS EROS Archive - Digital Elevation - Global 30 Arc-Second Elevation (GTOPO30) |
| Aspect                                                   | 2018                    | N/A                 | 1-km               | USGS EROS Archive - Digital Elevation - Global 30 Arc-Second Elevation (GTOPO30) |
| Soil Texture                                             | 2021                    | N/A                 | 10 to 30-m         | Gridded Soil Survey Geographic (gSSURGO) Database                                |
| Land Use                                                 | 2021                    | N/A                 | 30-m               | National Land Cover Dataset (NLCD)                                               |
| Precipitation                                            | 2001 to 2021            | Daily               | 4-km               | Parameter-elevation Relationships on Independent Slopes Model (PRISM)            |
| Antecedent Precipitation Index (API)                     | 2001 to 2021            | Daily               | 4-km               | Parameter-elevation Relationships on Independent Slopes Model (PRISM)            |
| Mean Temperature                                         | 2001 to 2021            | Daily               | 4-km               | Parameter-elevation Relationships on Independent Slopes Model (PRISM)            |
| Maximum Temperature                                      | 2001 to 2021            | Daily               | 4-km               | Parameter-elevation Relationships on Independent Slopes Model (PRISM)            |
| Minimum Temperature                                      | 2001 to 2021            | Daily               | 4-km               | Parameter-elevation Relationships on Independent Slopes Model (PRISM)            |
| Dew Point Temperature                                    | 2001 to 2021            | Daily               | 4-km               | Parameter-elevation Relationships on Independent Slopes Model (PRISM)            |
| <del>Normalized Difference Vegetation Index (NDVI)</del> | <del>2001 to 2021</del> | <del>Daily</del>    | <del>4-km</del>    | <del>Parameter-elevation Relationships on Independent Slopes Model (PRISM)</del> |
| Normalized Difference Vegetation Index (NDVI)            | 2001 to 2021            | Daily               | 9-km               | Advanced very-high-resolution radiometer (AVHRR)                                 |
| Leaf Area Index (LAI)                                    | 2001 to 2021            | Daily               | 9-km               | Advanced very-high-resolution radiometer (AVHRR)                                 |

138

## 139 2.3 Soil Moisture Standardization

140 Volumetric water content (VWC) varies according to weather conditions, soil properties,

141 vegetation cover, topographic features, and various other elements. Thus, it is not possible to

142 directly compare the VWC from different locations since a fine-textured soil will almost always





143 have a higher VWC than a coarse-textured soil. Therefore, VWC is commonly standardized  
144 using an approach such as soil moisture percentiles (Ford et al. 2016; Zhang et al. 2019). In this  
145 paper, we converted the soil moisture datasets to percentiles using the following approach. First,  
146 the VWC data were converted to VWC anomalies ( $\text{m}^3 \text{m}^{-3}$ ) by subtracting the climatological  
147 mean from the daily VWC value (Crow et al. 2012). A moving window approach was used to  
148 calculate the climatological mean. Following Chen et al. (2019), a 31-day moving window was  
149 used surrounding the target day, and all years of data from the period of record from that window  
150 were used to calculate the mean. Next, daily percentiles were calculated using the empirical  
151 cumulative distribution function based on a 31-day moving approach that used the entire period  
152 of record. According to Ford et al. (2016), at least 6 years of daily data are required to create  
153 stable and robust percentiles. In our case, soil moisture percentiles were calculated based on 7  
154 years of SMAP data and 21 years of NLDAS data.

### 155 **3. Methods**

156 The NLDAS and SMAP soil moisture data were downscaled using Random Forest. This  
157 algorithm was applied separately to the SMAP soil moisture (9-km) and the NLDAS soil  
158 moisture (12.5-km) to generate a 1-km soil moisture dataset over CONUS. Figure 1 provides a  
159 summary of the methods used to identify the most important features for downscaling soil  
160 moisture. The first step was to retrieve from different sources and **aggregate the ancillary**  
161 **variables by applying nearest-neighbor interpolation**. Then an RF model was generated for  
162 downscaling SMAP and NLDAS soil moisture products. The third step was to summarize feature  
163 importance. Each step is described in detail below.

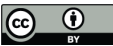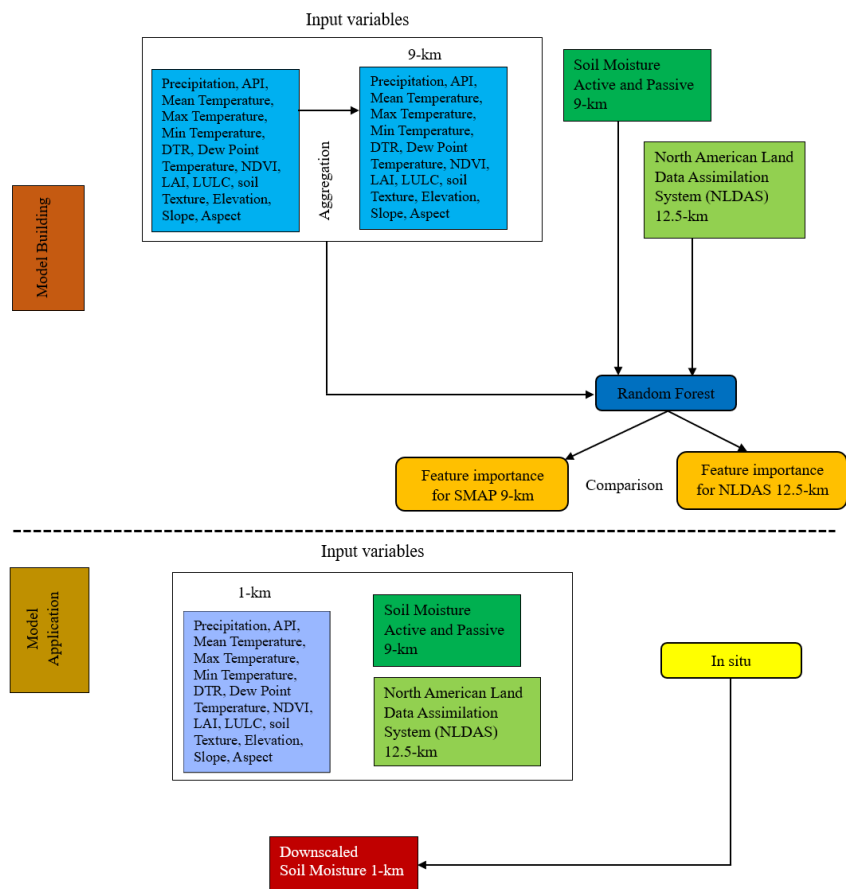

Figure 1: Schematic representation of the methodology used in this study

### 3.1 Nearest neighbor interpolation

All ancillary data are first aggregated to a resolution of 9-km and 12.5-km to construct the downscaling models. Nearest neighbor interpolation is used to resample the ancillary data (Table 1). Nearest neighbor is a method of spatial resampling that calculates the value of a new pixel based on the value of its nearest neighbor. This method was selected because it is computationally efficient and previous soil moisture downscaling studies have applied the nearest neighbor method (Alemohammad et al. 2018; Li et al. 2016; Liu et al. 2020, 2011). This



173 method was applied twice, once to generate features at the same resolution as SMAP (9-km) and  
174 to generate features at the same resolution as NLDAS (12.5-km).

### 175 **3.2 Downscaling soil moisture with random forest**

176 Soil moisture downscaling to 1-km from the native SMAP (9-km) and NLDAS (12.5-km)  
177 resolutions was done using Random Forest. Random Forest (RF) was first developed by  
178 (Breiman 2001) and then later advanced by (Cutler et al. 2012). RF is an integrated learning  
179 algorithm that can be used for both classification of a categorical response and regression for  
180 continuous variables (Li et al. 2013; Lu et al. 2014). The advantages of RF are that it is very fast  
181 to train and predict, it only depends on a few tuning parameters, and it can be used for high-  
182 dimensional problems, outlier detection, and visualization (Cutler et al. 2012). The regression  
183 model in RF was used for downscaling soil moisture in this study.

184 The dataset was randomly split into 80% training and 20% testing for model evaluation.  
185 To optimize the model, we performed randomized search cross-validation over a set of  
186 hyperparameters, including the number of trees (n\_estimators): {20, 40, 60, ..., 200}, maximum  
187 depth of trees (max\_depth): {10, 20, 30, ..., 110, None}, maximum number of features per split  
188 (max\_features): {'auto', 'sqrt'}, minimum number of samples per split (min\_samples\_split): {2,  
189 5, 10}, minimum number of samples per leaf (min\_samples\_leaf): {1, 2, 4}, and bootstrap  
190 sampling method: {True, False}. The hyperparameter tuning is the same for each region.

191 The RF model for SMAP was generated using data from 2015 to 2021, and the RF model  
192 for NLDAS was generated using data from 2001 to 2021. A 3-fold cross-validation was used for  
193 cross-validation, each fold randomly selected 80% of the data for training and the remaining  
194 20% was used for validation. The RF model with the highest accuracy was selected based on the

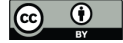

195 cross-validation. This model was used to **downscale the soil moisture to 1-km resolution** and this  
196 downscaled soil moisture was **validated using the in-situ measurements**. This process was  
197 repeated separately **for SMAP and NLDAS**.

### 198 **3.3 Model evaluation**

199 The correlation coefficient (R), coefficient of determination ( $R^2$ ), mean absolute error  
200 (MAE), **mean squared error (MSE)**, and root mean square error (RMSE) were used for validating  
201 the downscaled soil moisture data. R and  $R^2$  measure the goodness-of-fit of the model. MAE,  
202 MSE and RMSE measure the error between the actual and downscaled soil moisture values.

$$203 \quad R = \frac{\text{Cov}(SM_o, SM_p)}{\sqrt{\text{Var}[SM_o]\text{Var}[SM_p]}}$$

$$204 \quad R^2 = 1 - \frac{\sum_{i=1}^n [(SM_p - SM_{mp})(SM_o - SM_{mo})]^2}{\sum_{i=1}^n (SM_p - SM_{mp})^2 \sum_{i=1}^n (SM_o - SM_{mo})^2}$$

$$205 \quad MAE = \frac{1}{n} \sum_{i=1}^n |SM_o - SM_p|$$

$$206 \quad MSE = \frac{1}{n} \sum_{i=1}^n (SM_o - SM_p)^2$$

$$207 \quad RMSE = \sqrt{\frac{\sum_{i=1}^n (SM_o - SM_p)^2}{n}}$$

208 Where n is the number of observations,  $SM_o$ ,  $SM_p$ ,  $SM_{mo}$ ,  $SM_{po}$  represent the observed soil  
209 moisture value, predicted soil moisture value, mean observed soil moisture value, and mean  
210 predicted soil moisture value.

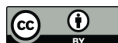

## 211 4 Results

### 212 4.1 Feature importance for SMAP downscaling

213 There are two measures that can be used to quantify the predictive power of individual  
214 features in RF Regression: (1) an increased mean squared error (IncMSE) and, (2) an increase in  
215 the number of nodes purified (IncNudePurity). IncMSE measures how an individual feature  
216 changes when it is permuted at random. IncMSE measures the degree to which the accuracy of  
217 Random Forest decreases when a feature is removed. Fourteen features were used to downscale  
218 the coarse resolution of soil moisture products to 1-km resolution. The IncMSE was calculated  
219 for each feature in each of the 9 regions to determine feature importance.

220 At the national (CONUS) scale, elevation is the most influential variable and dew point  
221 temperature is the second most important feature (Figure 2). Maximum temperature is also  
222 ranked as an important variable that improves the accuracy of downscaling of SMAP VWC over  
223 CONUS. The least important features at the national scale are slope, aspect, and LAI.

224 In addition to evaluating feature importance for each region, the analysis was also  
225 replicated by evaluating feature importance for different regions of CONUS. Figure 3 shows the  
226 feature importance for SMAP VWC by region. The dew point temperature is the most important  
227 feature in all regions, except the WestNorthCentral and South regions. Elevation is the most  
228 important variable in these two regions. API is the second-most important variable in the  
229 NorthWest, West, and SouthWest regions. Maximum, minimum, and mean temperature also play  
230 a significant role in downscaling soil moisture. LAI is a feature that consistently is ranked as a  
231 relatively unimportant feature for downscaling soil moisture (ranks from 0.1 to 0.2 across the 9  
232 regions).



233           This study evaluates both VWC and soil moisture percentiles. Therefore, we can compare  
234   the relative feature importance for downscaling soil moisture percentiles. At the CONUS scale,  
235   dewpoint temperature is the most influential variable (Figure 4). This is followed by API and  
236   elevation. The results at the CONUS scale are relatively consistent with the regional results.  
237   Additionally, precipitation, maximum, mean temperatures, and DRT are all relatively important  
238   variables for downscaling soil moisture percentiles at the CONUS scale (rank ranges from 3 to  
239   6).

240           Similar to the results for SMAP VWC, dew point temperatures are the most influential  
241   variable in all regions except the South (Figure 5). Elevation is the most influential feature in the  
242   South. The second most important feature is either API or elevation. API is the second-most  
243   influential variable in the NorthWest, SouthWest, and EastNorthCentral, NorthEast, SouthEast,  
244   and Central regions. While elevation is the second most important feature of WestNorthCentral  
245   regions. LAI, aspect, slope, NDVI, and LULC are the least important features for downscaling  
246   soil moisture percentiles.

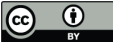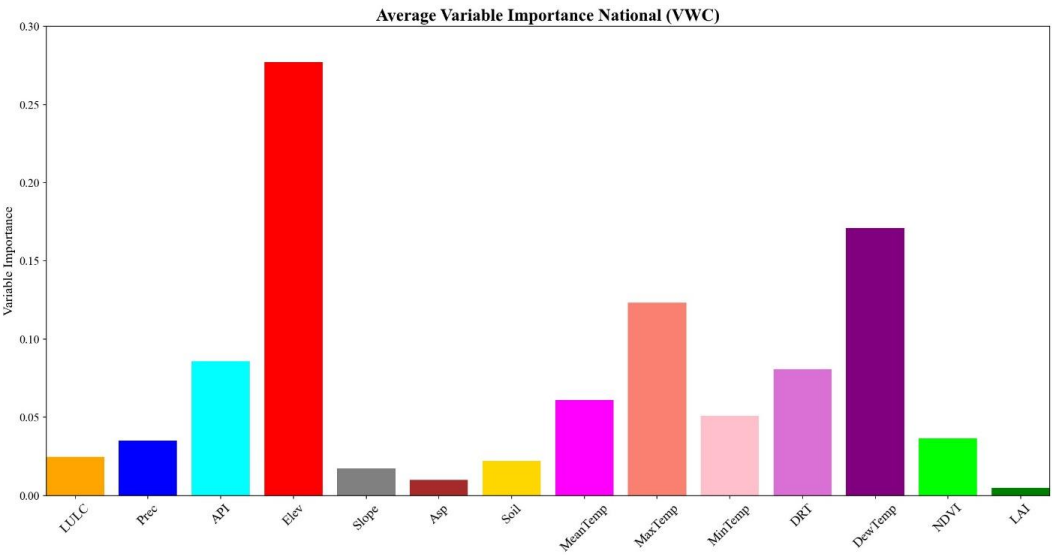

Figure 2: Feature importance (IncMSE%) for CONUS for SMAP VWC

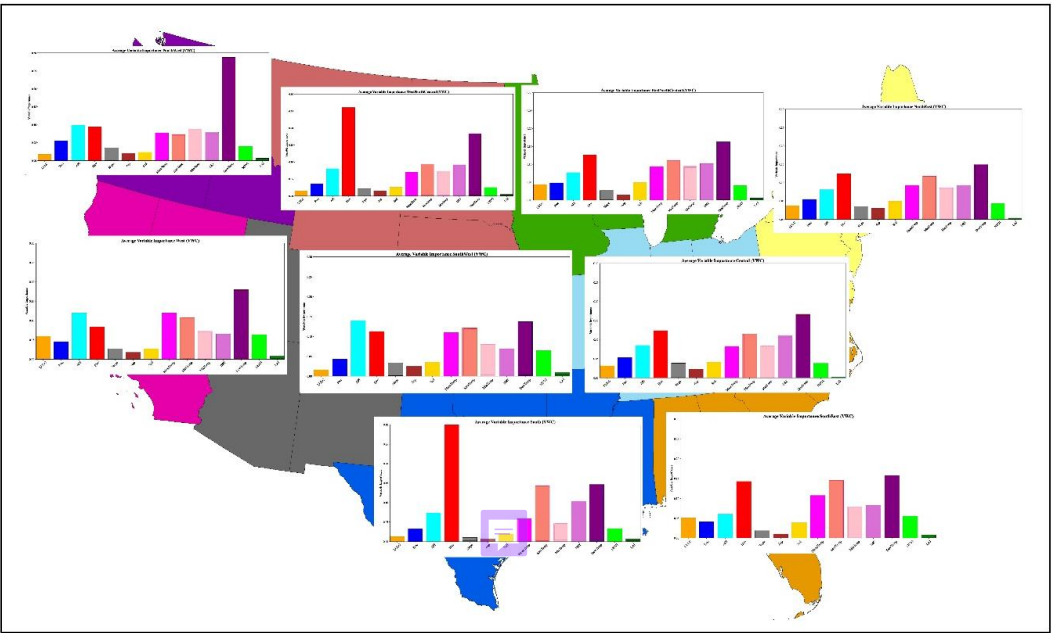

Figure 3: Features importance (IncMSE%) by region for SMAP VWC

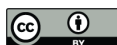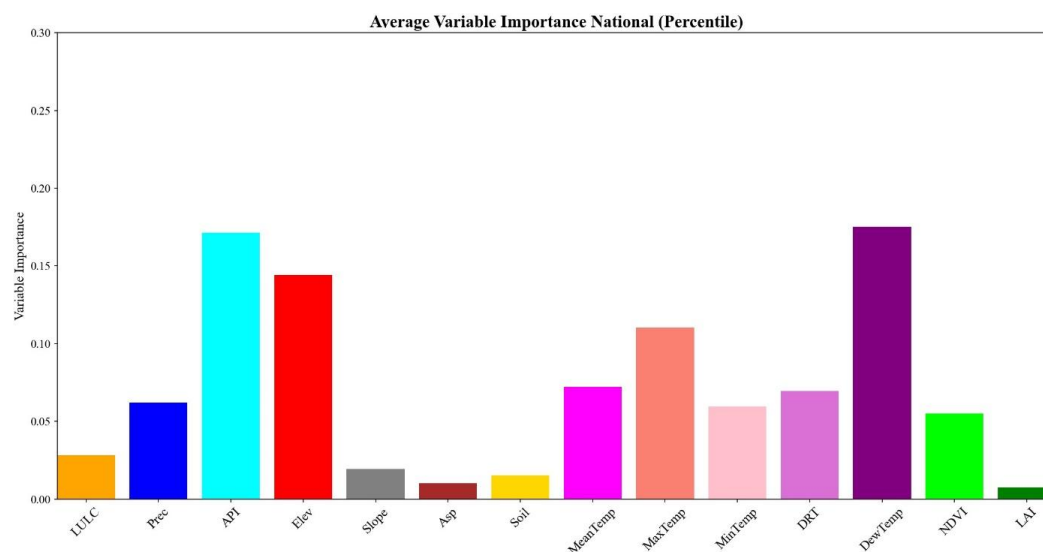

Figure 4: Feature importance (IncMSE%) for CONUS for SMAP percentile

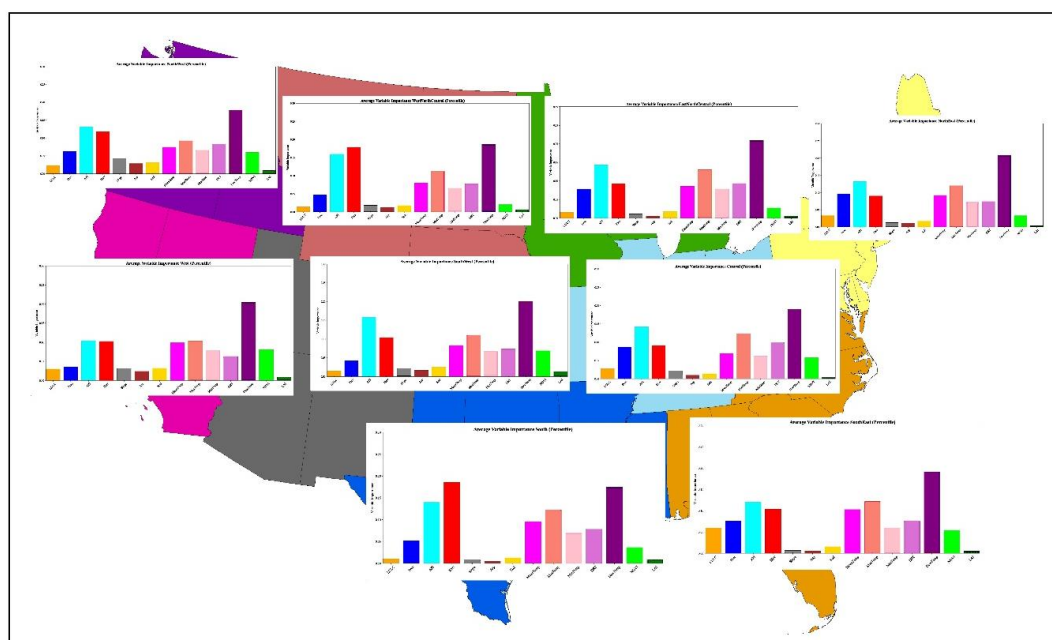

Figure 5: Feature importance (IncMSE%) by region for SMAP percentiles





## 4.2 Feature importance for NLDAS downscaling

At the CONUS scale, dew point temperature is the most important feature (Figure 6).

Elevation and maximum temperature have almost the same influence and are ranked as the second and third most important features on the CONUS scale. Though elevation was the highest influential variable for SMAP VWC, elevation is ranked second here. However, as SMAP VWC, slope, aspect, LAI ranked the lowest.

Figure 7 shows the feature importance for downscaling NLDAS VWC in each region.

Dew point temperature is the most important feature in all regions. Elevation is the second-highest important feature in all regions, except the NorthWest, West, SouthWest, and EastNorthCentral regions. The second most important variable for the NorthWest, SouthWest, and EastNorthCentral region is maximum temperature; for the West is mean temperature. Maximum and mean temperature are also influential features for downscaling NLDAS VWC. They typically rank as each region's 3rd or 4th most important features. While LAI and aspect are generally the least important features. These results are quite consistent with the SMAP feature importance.

At the CONUS scale, dewpoint temperature is again the most influential feature (Figure 8). This is followed by API and elevation. Maximum and mean temperatures are also influential features at the CONUS scale. The results of the feature importance for NLDAS soil moisture percentiles are consistent with NLDAS VWC. Dew point temperature is the most important feature in all regions (Figure 9). API is the second most important feature in all regions, except the NorthWest, West, WestNorthCentral. In these regions, elevation is the second most important feature. LAI and aspect consistently have the lowest feature importance for downscaling NLDAS soil moisture percentiles.

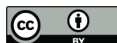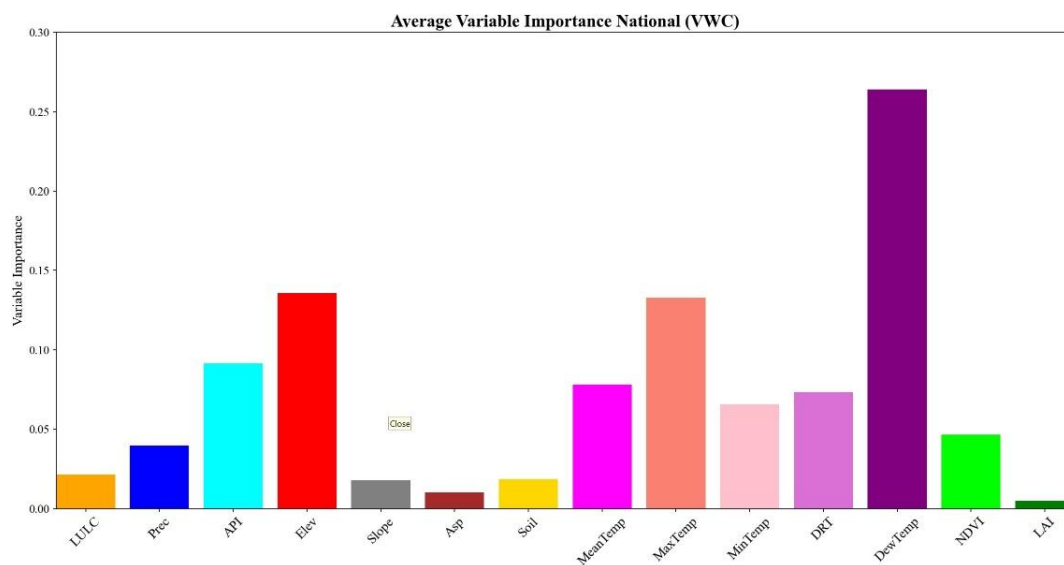

Figure 6: Feature importance (IncMSE%) for CONUS for NLDAS VWC

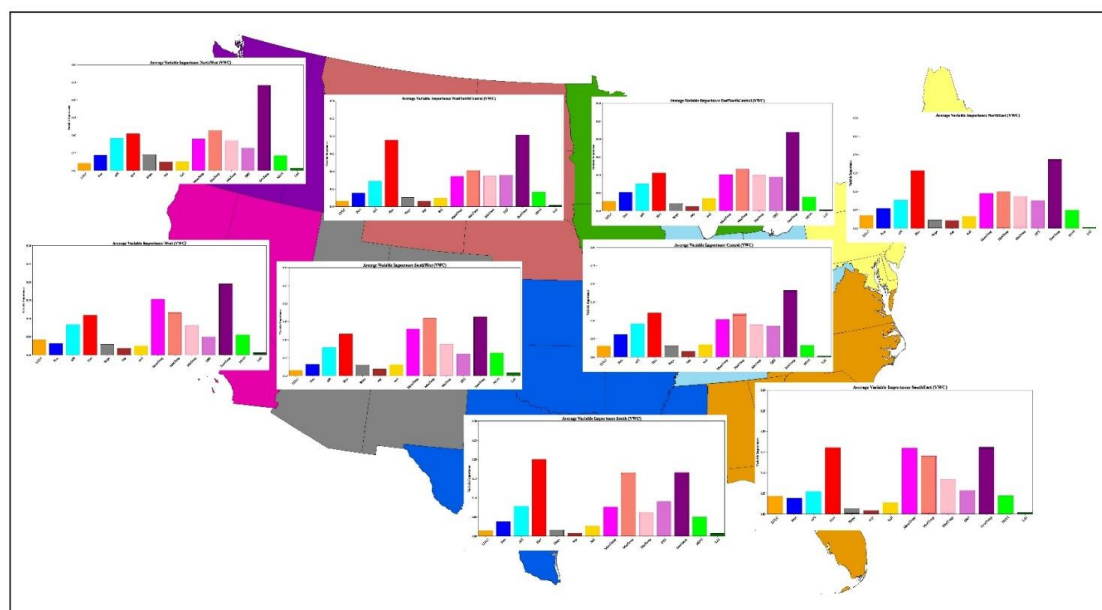

Figure 7: Feature importance (IncMSE%) by region for NLDAS VWC

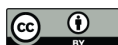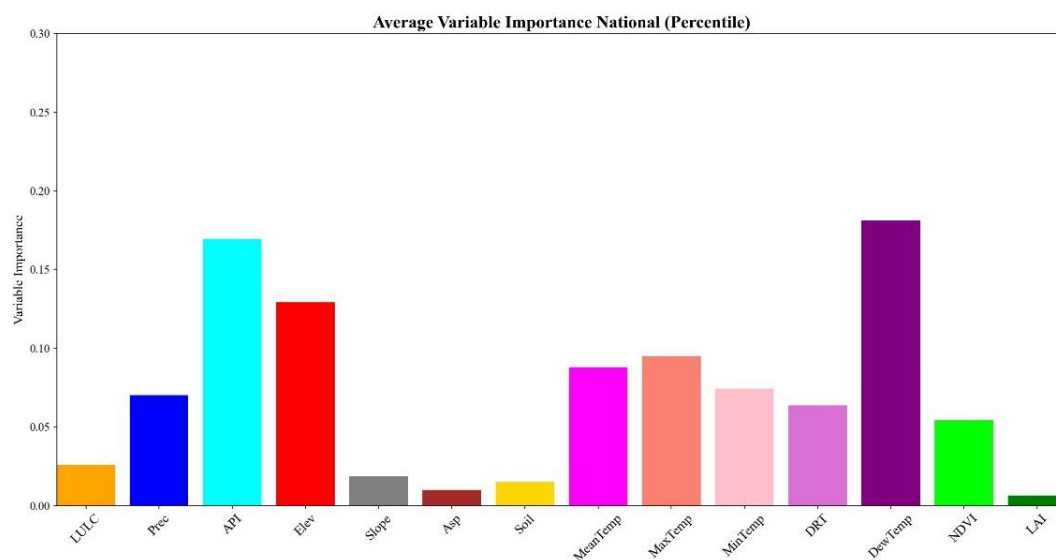

282

Figure 8: Feature importance (IncMSE%) for CONUS for NLDAS percentiles

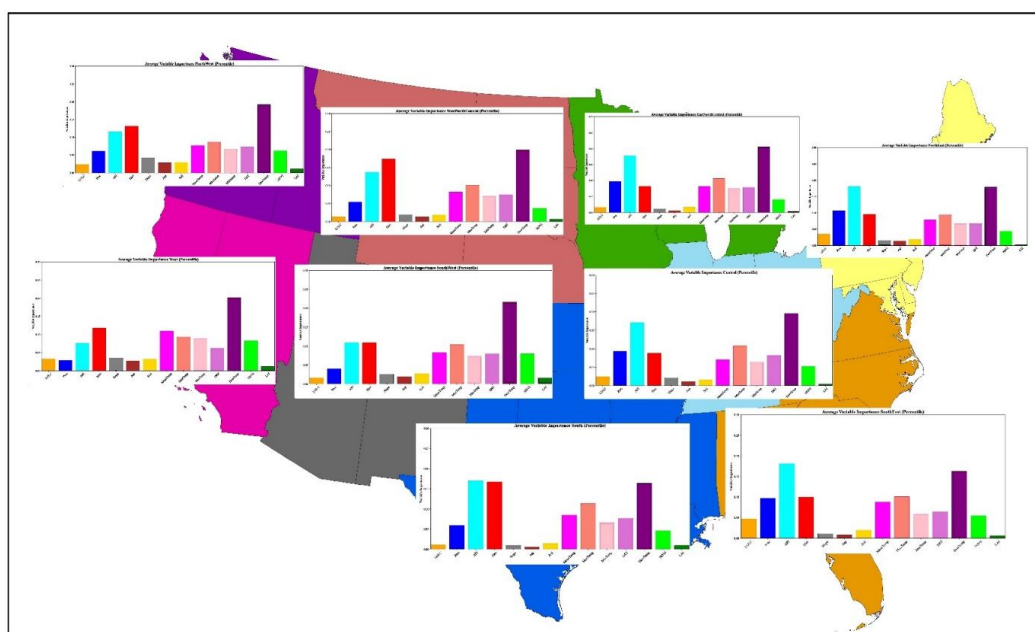

283

Figure 9: Feature importance (IncMSE%) by region for NLDAS percentile

284



285 **4.3 Partial dependence plot (PDP) of variables**

286 Figure 10 represents the relationship between predicted soil moisture and the other  
287 variables (dew point temperature, elevation, API, and maximum temperature).

288

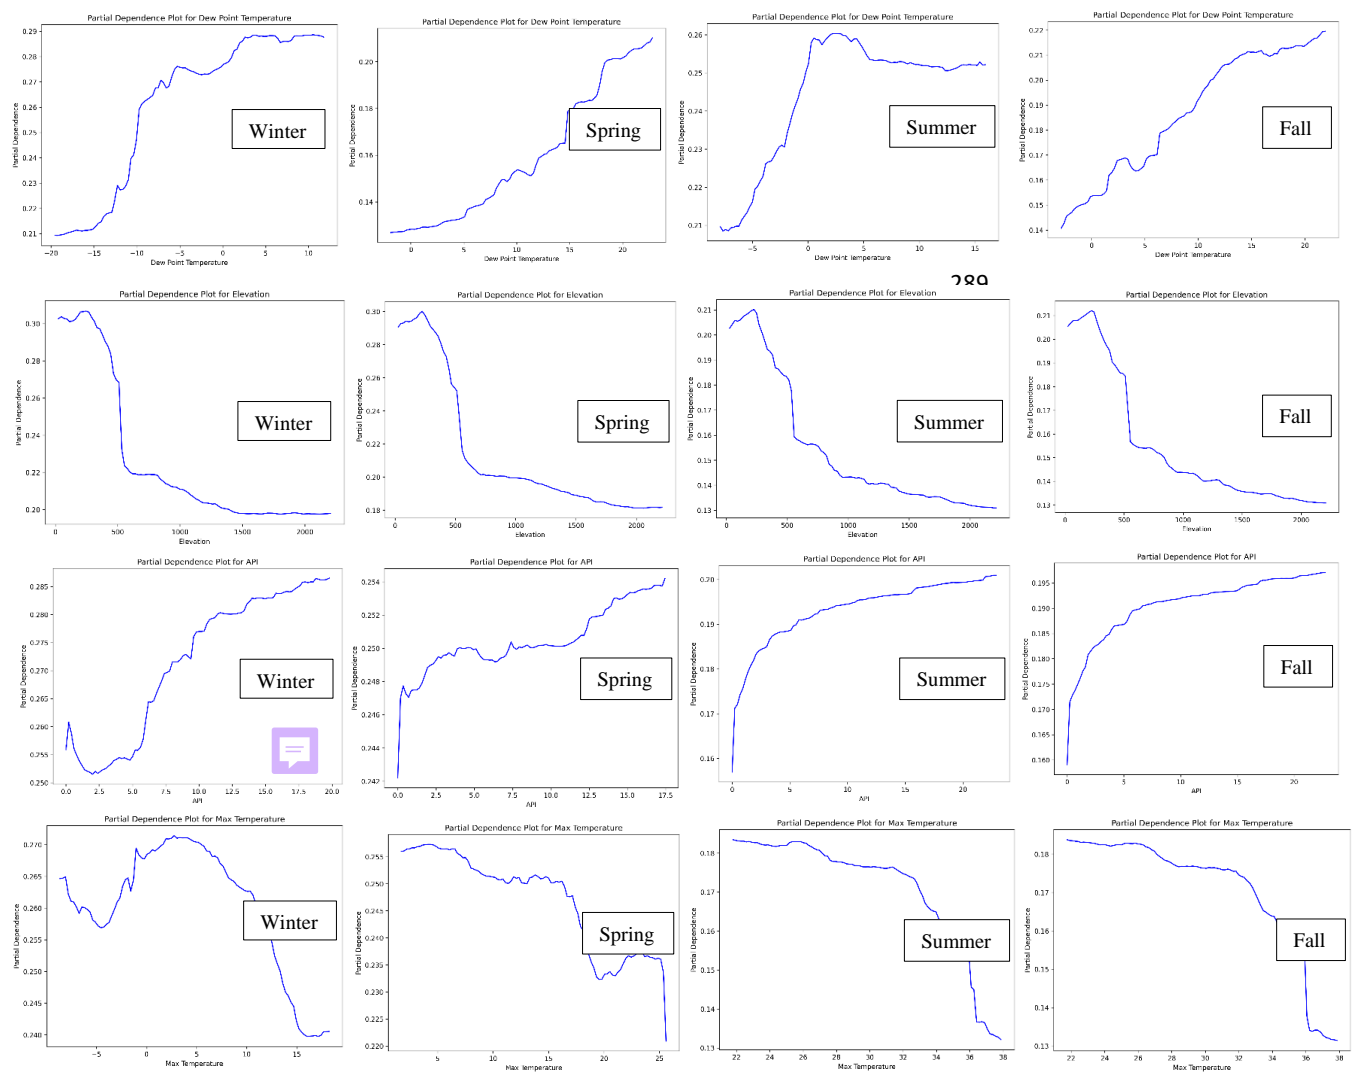

300

301 **Figure 10: Partial dependence plot for the four most important variables**

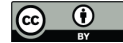

The higher dew point temperature is related to the high soil moisture values in all seasons. The lower elevation seems to have high soil moisture values in four seasons which is reasonable because in the high elevation, the water content in the soil is low. If the API value is increasing, the value of water content in the soil will be high and vice versa. On the other hand, with the increasing maximum temperature, the soil moisture will be decreasing.

### 4.3 Accuracy of VWC downscaling

Table 2 shows the accuracy of the VWC downscaling in each region based on the validation against in situ measurements. As shown in the table, the R-value is  $< 0.5$  and  $R^2 < 0.25$  for NLDAS downscaling. The average absolute difference between the SMAP downscaling and observed value (MAE) ranges from 0.074 to 0.092. The Central region has a relatively low MAE of 0.074, indicating a small average absolute difference between the predicted and actual values. The highest value of MSE is 0.014 corresponding to SouthEast and 0.013 to EastNorthCentral and the lowest value is 0.008 corresponding to South. The ubRMSE for the South is 0.082 which is the lowest and for the SouthEast is 0.109 which is the highest. Although the  $R^2$  values are relatively low, the errors (MAE and ubRMSE) are also low. This indicates that the downscaling is skillful.

Table 2: Accuracy of 1-km downscaled soil moisture (VWC) by region for SMAP and NLDAS

|         | R     |       | R <sup>2</sup> |       | MAE   |       | MSE   |       | RMSE  |       | ubRMSE |       | Bias   |        |
|---------|-------|-------|----------------|-------|-------|-------|-------|-------|-------|-------|--------|-------|--------|--------|
|         | SMAP  | NLDAS | SMAP           | NLDAS | SMAP  | NLDAS | SMAP  | NLDAS | SMAP  | NLDAS | SMAP   | NLDAS | SMAP   | NLDAS  |
| Central | 0.451 | 0.352 | 0.204          | 0.146 | 0.074 | 0.086 | 0.009 | 0.011 | 0.093 | 0.104 | 0.089  | 0.091 | -0.008 | -0.021 |

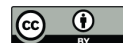

|                  |       |       |       |       |       |       |       |       |       |       |       |       |        |        |
|------------------|-------|-------|-------|-------|-------|-------|-------|-------|-------|-------|-------|-------|--------|--------|
| EastNorthCentral | 0.403 | 0.494 | 0.157 | 0.248 | 0.092 | 0.072 | 0.013 | 0.010 | 0.115 | 0.097 | 0.093 | 0.087 | 0.053  | -0.017 |
| NorthEast        | 0.323 | 0.337 | 0.104 | 0.131 | 0.075 | 0.084 | 0.009 | 0.010 | 0.095 | 0.100 | 0.089 | 0.085 | 0.001  | -0.017 |
| NorthWest        | 0.268 | 0.298 | 0.065 | 0.090 | 0.080 | 0.085 | 0.009 | 0.010 | 0.097 | 0.100 | 0.092 | 0.089 | 0.022  | 0.014  |
| South            | 0.568 | 0.551 | 0.323 | 0.304 | 0.072 | 0.069 | 0.008 | 0.007 | 0.091 | 0.086 | 0.082 | 0.080 | -0.033 | -0.020 |
| SouthEast        | 0.419 | 0.622 | 0.176 | 0.386 | 0.094 | 0.084 | 0.014 | 0.010 | 0.116 | 0.101 | 0.109 | 0.090 | 0.034  | 0.010  |
| SouthWest        | 0.364 | 0.622 | 0.132 | 0.073 | 0.078 | 0.091 | 0.010 | 0.012 | 0.098 | 0.108 | 0.093 | 0.097 | -0.020 | -0.004 |
| West             | 0.308 | 0.270 | 0.099 | 0.081 | 0.075 | 0.084 | 0.009 | 0.010 | 0.094 | 0.099 | 0.092 | 0.090 | 0.016  | 0.025  |
| WestNorthCentral | 0.520 | 0.494 | 0.270 | 0.248 | 0.073 | 0.080 | 0.008 | 0.010 | 0.091 | 0.097 | 0.085 | 0.087 | -0.011 | 0.004  |
| National         | 0.514 | 0.509 | 0.192 | 0.259 | 0.082 | 0.083 | 0.010 | 0.010 | 0.102 | 0.100 | 0.100 | 0.095 | -0.015 | -0.011 |

320

#### 321 4.4 Accuracy of percentile downscaling

322 Table 3 provides the evaluation metrics of soil moisture downscaling for percentiles by  
323 region. The South region has the lowest MAE of 0.195, indicating the smallest average absolute  
324 difference between predicted and actual values among all the regions. The MSE is also the  
325 lowest which is 0.061 for this region, indicating a higher average squared difference. The RMSE  
326 of 0.248 is also the lowest among the regions, indicating the smallest average absolute  
327 difference. On the other hand, the NorthWest and SouthWest regions are characterized by the  
328 highest MAE of 0.223, which indicates a greater average absolute difference between the  
329 predicted and actual values compared to other regions. As indicated by the MSE value of ~0.076,  
330 there is a greater average squared difference between the two regions. RMSE of ~0.275 indicates

331 Table 3: Accuracy of 1-km downscaled soil moisture (percentiles) by region for SMAP  
332 and NLDAS

|         | R     |       | R <sup>2</sup> |       | MAE   |       | MSE   |       | RMSE  |       | ubRMSE |       | Bias   |        |
|---------|-------|-------|----------------|-------|-------|-------|-------|-------|-------|-------|--------|-------|--------|--------|
|         | SMAP  | NLDAS | SMAP           | NLDAS | SMAP  | NLDAS | SMAP  | NLDAS | SMAP  | NLDAS | SMAP   | NLDAS | SMAP   | NLDAS  |
| Central | 0.423 | 0.536 | 0.187          | 0.297 | 0.200 | 0.177 | 0.065 | 0.050 | 0.256 | 0.224 | 0.222  | 0.198 | -0.055 | -0.016 |

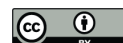

|                  |       |       |       |       |       |       |       |       |       |       |       |       |        |        |
|------------------|-------|-------|-------|-------|-------|-------|-------|-------|-------|-------|-------|-------|--------|--------|
| EastNorthCentral | 0.411 | 0.429 | 0.198 | 0.304 | 0.207 | 0.195 | 0.065 | 0.056 | 0.256 | 0.236 | 0.216 | 0.189 | -0.026 | -0.045 |
| NorthEast        | 0.269 | 0.307 | 0.085 | 0.120 | 0.207 | 0.211 | 0.066 | 0.068 | 0.257 | 0.261 | 0.226 | 0.220 | -0.048 | -0.034 |
| NorthWest        | 0.229 | 0.194 | 0.050 | 0.048 | 0.223 | 0.237 | 0.076 | 0.084 | 0.276 | 0.291 | 0.249 | 0.252 | 0.0276 | -0.058 |
| South            | 0.442 | 0.488 | 0.195 | 0.238 | 0.195 | 0.175 | 0.061 | 0.049 | 0.248 | 0.223 | 0.224 | 0.208 | -0.068 | -0.019 |
| SouthEast        | 0.394 | 0.437 | 0.156 | 0.195 | 0.207 | 0.189 | 0.066 | 0.055 | 0.258 | 0.236 | 0.227 | 0.212 | -0.081 | -0.027 |
| SouthWest        | 0.229 | 0.229 | 0.053 | 0.058 | 0.223 | 0.228 | 0.077 | 0.079 | 0.278 | 0.281 | 0.256 | 0.253 | 0.000  | -0.042 |
| West             | 0.238 | 0.180 | 0.062 | 0.047 | 0.216 | 0.226 | 0.072 | 0.076 | 0.268 | 0.276 | 0.245 | 0.245 | -0.015 | -0.025 |
| WestNorthCentral | 0.363 | 0.367 | 0.141 | 0.144 | 0.215 | 0.218 | 0.073 | 0.074 | 0.270 | 0.272 | 0.253 | 0.244 | -0.021 | -0.054 |
| National         | 0.425 | 0.370 | 0.029 | 0.138 | 0.217 | 0.226 | 0.073 | 0.080 | 0.270 | 0.284 | 0.260 | 0.262 | -0.033 | -0.080 |

333

334 a greater average absolute difference among the regions. The lowest MAE value is 0.175 in the  
335 South region. The lowest MAE value indicates the closer alignment between actual and predicted  
336 values. The average squared difference between the expected and actual values ranges from  
337 0.050 to 0.086. Similar patterns can be observed between MSE and RMSE values. The lowest  
338 value of RMSE is 0.223 indicating good predictions for South regions.

## 339 5 Discussion

### 340 5.1 Feature importance

341 A complex interaction between pedologic, topographic, vegetative, and meteorological  
342 factors is responsible for the extensive horizontal variability in surface soil moisture fields  
343 (Mohanty and Skaggs 2001). It is difficult to isolate and measure these factors, however,  
344 understanding their magnitude is critical for determining soil moisture upscaling strategies  
345 (Crow et al. 2012).

346 Topography is another crucial factor that influences the spatial organization of soil  
347 moisture at various scales. The topographic attributes such as slope, aspect affect the movement  
348 of water through gravity-driven processes, such as runoff and infiltration, leading to variations in



349 soil moisture across the landscape (Crow et al. 2012). This research ~~also complements~~ that  
350 topography is an important factor because elevation is the most influential factor and second  
351 highest factor relatively in SMAP VWC and NLDAS VWC downscaling over CONUS. In  
352 addition, elevation ranks third for percentile downscaling for both data sources. Understanding  
353 the role of topography is essential for accurately characterizing and predicting soil moisture  
354 patterns. Charpentier and Groffman (1992) suggested that variations in topography play a  
355 significant role in shaping the spatial distribution of soil moisture, with more diverse topographic  
356 features leading to increased variability in soil moisture. This study shows the South and  
357 WestNorthCentral regions have the influences of slope regardless of data sources and units of  
358 measurement. Since the WestNorthCentral region includes portions of the Rocky Mountains, and  
359 the mountainous area has high variability in elevation. It has been demonstrated that relative  
360 slope position significantly impacts determining soil moisture variation. When considering  
361 different time scales, a straightforward averaging of soil moisture values across a slope is likely  
362 to produce errors (Mohanty et al. 2000; Jacobs 2004). Here, this research shows differences  
363 because slope has a relatively low impact on the downscaling for both data sources and both  
364 units of measurement (VWC and percentile). In addition, the aspect (direction of slope) also has  
365 less impact on the downscaling in all the regions and over CONUS too. The effects of slope on  
366 soil moisture are more localized and dependent on other factors rather than being significant. It is  
367 important to mention that slope influences soil moisture in various ways, including its length and  
368 direction (aspect). Although these effects are generally less pronounced than those that elevation  
369 has on the local microclimate and hydrology, they can be observed (Bennie et al. 2008).

370         Among these meteorological factors, precipitation is considered the single most  
371 important forcing factor for soil moisture content and its distribution (Crow et al. 2012). This





research agrees with Crow et al. (2012) because the precipitation index (API) ranks second in terms of SMAP percentile downscaling over the CONUS. Furthermore, API is also a dominant factor for the South, WestNorthCentral, NorthWest, SouthWest regions. Sivapalan et al. (1987) and Famiglietti et al. (1999) found the mean soil moisture trend changed with the precipitation gradient. The soil moisture storage, drainage, and water budget for different climate patterns changed with the intensity of rainfall (Kim et al. 1997; Salvucci 2001). To date, there has not been any research that has shown that dew point temperature is useful for downscaling soil. The present study found that dew point temperature is the most important feature for downscaling soil moisture for both products and both measurements, except SMAP VWC over the CONUS. Although elevation has the highest impact on SMAP VWC downscaling over the CONUS, dew point temperature has the highest influence over all the regions except the South, and WestNorthCentral regions both for SMAP VWC and percentile downscaling. For NLDAS VWC and percentiles, only the South region is different.

There are a number of ways that the dew point temperature can influence soil moisture. First, when the air temperature cools to the dew point temperature water vapor will condense, forming dew on the soil surface and vegetation (Monteith, 1957, Jacobs et al. 2000). Second, dew point temperature can also affect the transpiration rates of plants (Ambrose et al. 2009). Soil evaporation and plant transpiration will increase as a function of the vapor pressure gradient. Therefore, dew point temperature fluctuations can influence the wetting and drying cycles of the soil (Zhou et al. 2008).

Precipitation, mean, maximum, and minimum temperatures also have an impact on soil moisture. Higher temperatures tend to be associated with an increased vapor pressure deficit between the soil surface and the air, and this leads to a higher evaporation rate from the soil.



395 Higher temperatures can cause the soil to dry out more rapidly, particularly from the surface of  
396 the soil (Balugani et al. 2014). They can also cause vegetation to utilize more soil water and so  
397 they can cause the depletion of soil moisture (Oren et al. 1999).

398 The distribution of soil moisture is significantly affected by soil heterogeneity, due to  
399 variations in soil properties such as texture, organic matter content, porosity, and structure. As a  
400 result of these variations, soil moisture can significantly differ over small spatial distances,  
401 influencing local hydrological processes. The color of the soil can also influence the rate of  
402 evaporative drying for bare or lightly vegetated soils by affecting the albedo. Soil hydraulic  
403 conductivity affects processes such as water infiltration, redistribution, and drainage, which in  
404 turn impact the distribution of soil moisture across a given area (Moore et al. 1988; Kim and  
405 Barros 2002). Although previous research concluded that soil type has a significant impact on  
406 soil moisture, this research found that soil type has minimal impact on downscaling soil  
407 moisture. In addition, whether over the CONUS or for all the regions, soil type is one of the least  
408 influential variables. The reason could be that other factors like elevation, prevailing climate, and  
409 precipitation patterns have a greater impact than the soil texture.

410 Previous work has concluded that variations in soil moisture are more strongly influenced  
411 by vegetation than by soil and topography (Crow et al. 2012). Our results do not support this  
412 conclusion (at least for 1-km soil moisture) since the vegetation variables (NDVI and LAI) were  
413 less important than topography. Soil moisture is spatially variable as a result of various processes  
414 that involve water uptake, transpiration, and the surface energy budget. The influence of land  
415 cover characteristics must be understood to accurately model and predict soil moisture dynamics.  
416 Land cover affected soil moisture distribution significantly at the satellite footprint during the  
417 NAFE'05 field campaign in Australia (Panciera et al. 2008). The regional distribution of soil



418 moisture was noted to be impacted by variations in land cover (Cosh et al. 2004; Joshi and  
419 Mohanty 2010). However, the results of our study indicated that land cover was not an important  
420 feature for downscaling soil moisture to 1-km resolution. It had minimal impact on the  
421 downscaling regardless of the data sources or soil moisture measurement. These results were  
422 consistent over the CONUS and all regions.

423 Drawing broad conclusions regarding the impact of soil, topography, land cover,  
424 vegetation, and meteorological forcing can be challenging because feature importance is strongly  
425 influenced by the spatial scale of analysis and the region of interest (Crow et al. 2012). Our study  
426 results demonstrate that there can be substantial region variations in feature importance and that  
427 feature importance is also a function of the data source, unit of measurement and spatial  
428 resolution.

429 Regions may differ in terms of climatic, geographic, and soil characteristics, which can  
430 have a significant impact on the relationship between the input features and soil moisture.  
431 Regions with limited or incomplete data may be difficult to predict accurately. Our analysis  
432 demonstrates that other than elevation, temperature is an important feature in the South. This  
433 region includes Texas, Louisiana, Mississippi, Arkansas, Kansas, and Oklahoma. It is  
434 characterized by a warm and humid climate. Soil moisture is influenced by precipitation and  
435 topography. Periodic droughts have a strong influence on soil water content (Bond et al. 2008;  
436 Engle et al. 2008).

437 The northeastern region includes New York, Pennsylvania, Connecticut, Delaware,  
438 Maine, Maryland, Massachusetts, New Hampshire, New Jersey, Vermont, and Rhode Island. It  
439 has a temperate climate with distinct seasonal patterns. Seasonal variations in precipitation and  
440 snowmelt can significantly impact soil moisture patterns (Daly et al. 2008). Our results



441 demonstrate that API, dew point temperature, and temperature influence soil moisture. The  
442 northwestern region includes Idaho, Oregon, and Washington. It has a diverse climate ranging  
443 from maritime to continental. The EastNorthCentral includes Iowa, Michigan, Minnesota, and  
444 Wisconsin. It has a humid continental climate with distinct seasonal changes. The region is  
445 dominated by the Great Lakes. Soil moisture depends on temperature and precipitation patterns  
446 (Kunkel et al. 2013). Our results demonstrate that API and temperature have a significant impact  
447 on soil moisture.

448 The WestNorthCentral includes Montana, Nebraska, North Dakota, South Dakota, and  
449 Wyoming. It is characterized by a continental climate with hot summers and cold winters.  
450 Snowmelt and spring rains can increase soil moisture levels (Kunkel et al. 2013). Temperature  
451 and dew point temperature are important features for accurately downscaling soil moisture. The  
452 West includes California and Nevada. It has a diverse range of climates, from Mediterranean to  
453 arid and semi-arid. This region with mountainous terrain may experience higher soil moisture  
454 levels due to increased precipitation (Nielsen et al. 2024). The SouthWest includes Arizona,  
455 Colorado, New Mexico, and Utah. It has an arid to semi-arid climate. However, soil moisture is  
456 lower in this region (Huxman et al. 2004) and API has an impact on the soil moisture. Moreover,  
457 topographic features such as mountains and valleys can cause localized variations in soil  
458 moisture (Seager et al. 2007), which is evident in the present study.

### 459 **5.3 Model evaluation**

460 Abbaszadeh et al. (2019) downscaled SMAP 9-km (SMAP level 3) soil moisture to 1-km  
461 over the CONUS using ensemble learning methods and they found overall the ubRMSE between  
462 downscaled and in-situ observations met the SMAP accuracy requirement of 0.04. The  
463 downscaled soil moisture data showed a strong correlation ( $R=0.325$  to  $0.997$ , average  $0.715$ )



464 and high accuracy ( $ubRMSE=0.010$  to  $0.141\text{ m}^3/\text{m}^3$ , average  $0.041\text{ m}^3/\text{m}^3$ ) compared to the in-  
465 situ soil moisture measurements (Xu et al. 2022). Our study shows that the  $ubRMSE$  value for  
466 SMAP VWC is  $0.100\text{ m}^3/\text{m}^3$ . The reason could be the different methods of downscaling because  
467 our analysis used RF, while Xu et al. (2022) used an ensemble approach. In addition, Xu et al.  
468 (2022) used SMAP level 3, while this analysis used SMAP level 4.

469 Sun and Cui (2021) downscaled VWC in the central United States using support vector  
470 machine (SVM). The correlation between their downscaled soil moisture and the in-situ  
471 measurements ranged from 0.174 to 0.754, and their RMSE ranged from 0.063 to 0.101. In our  
472 study, the correlation between the downscaled soil moisture and in-situ measurements in the  
473 central region was 0.452 for SMAP VWC and 0.352 for NLDAS VWC. The RMSE was 0.093  
474 for SMAP VWC and 0.104 for NLDAS VWC. Therefore, our results are relatively comparable  
475 in terms of correlation and error.

476 Guevara and Vargas (2019) downscaled the soil moisture from 27-km to 1-km by  
477 training the kernel-weighted nearest neighbors across the conterminous United States. They  
478 showed that the downscaled soil moisture had an  $R^2$  value of 0.46. Our results generally have  
479 lower correlations for all the regions, except the South. It is possible that this is because Guevara  
480 and Vargas (2019) used different methods of downscaling such kernel-weighted nearest  
481 neighbors, while our approach was based on. There is also the difference of spatial native  
482 resolutions of soil moisture products that were used for downscaling.

483 Liu et al. (2020) downscaled soil moisture using six methods over different regions  
484 including Oklahoma. The  $R^2$  value for their Oklahoma region ranged from 0.287 to 0.714, and  
485 the MAE ranged from 0.027 to 0.055. The MAE in the South region in our study ranged from  
486 0.069 to 0.195. A similar study in Oklahoma state was done by Jiang and Cotton (2004) applying



the artificial neural network (ANN). Their RMSE was  $<0.04$ . Xu et al. (2021) downscaled SMAP 36-km soil moisture to 3-km and 1-km by applying the convolution neural network in Oklahoma. Xu et al. (2021) had a correlation of 0.659 and ubRMSE of 0.052 for their 1-km downscaled soil moisture using SMAP level 3 products from 1<sup>st</sup> January 2018 to 30<sup>th</sup> December 2018. While these studies had lower errors than our analysis, this is likely because they focused on a single state, while our region encompasses multiple states. In addition, they downscaled only one year soil moisture, but we downscaled daily soil moisture from 2015 to 2021 and evaluated performance using this entire period. In addition, Xu et al. (2021) utilized a convolutional neural network (CNN) and we used RF for downscaling.

Warner et al. (2021) downscaled VWC in Delaware to 100-m resolution using kernel k-nearest neighbor (KKNN) based on SSM estimates from the European Space Agency's Climate Change soil moisture products. They had an MAE of 0.048 (Warner et al. 2021). In comparison, our MAE in the NorthEast region, which includes Delaware, ranged from 0.076 to 0.082. Warner et al. (2021) likely had greater accuracy because they their study area is a single state (Delaware), while our NorthEast region includes Delaware, Connecticut, Maine, Maryland, Massachusetts, New Hampshire, New York, Pennsylvania, Rhode Island, and Vermont. In addition, Warner et al. (2021) downscaled different soil moisture data than our study.

Overall, the soil moisture downscaling is more accurate in the South, Central, and NorthEast regions, as they have lower error than in other regions. The downscaling was not as accurate in the NorthWest, SouthWest, West, and WestNorthCentral regions.

## **6 Conclusions**



508           This study evaluated and compared feature importance for downscaling satellite and  
509   model-derived soil moisture products across different regions. Random forest was applied to  
510   predict the soil moisture products (SMAP and NLDAS) to 1-km resolution over CONUS and in-  
511   situ data were used to validate the model. The conclusions are:

- 512       1) Results indicated that dew point temperature is the most important feature and elevation  
513       is the second most important feature for downscaling soil moisture in the United States.  
514       In general, the atmospheric features (e.g., temperature) have more impact on the  
515       downscaling than vegetation features. Vegetation features such as NDVI and LAI, as well  
516       as topographic features such as slope and aspect were not important for downscaling soil  
517       moisture to 1-km resolution.
- 518       2) Based on the accuracy metrics, downscaling VWC is more accurate than soil moisture  
519       percentiles.
- 520       3) Downscaled SMAP and NLDAS VWC was most accurate in the South and  
521       WestNorthCentral regions.

522       Our results can be used to improve feature selection for soil moisture downscaling.  
523   However, it is likely that the optimal features for downscaling soil moisture are strongly  
524   dependent on the spatial resolution of the analysis and the climatic, topographic and edaphic  
525   characteristics of the study region.

526       Future research can advance this work in the following ways. First, we can increase the  
527   validity of the accuracy assessment by using more in-situ data to validate the downscaling. This  
528   study compares the 1-km downscaled soil moisture to a single station. A better approach would  
529   be to use a dense network of stations to upscale the in-situ data to match the resolution of the soil  
530   moisture products. Second, given the substantial regional variations in performance, future work,



531 would benefit from including a more comprehensive set of features that account for soil moisture  
532 dynamics in each region. Third, the method of upscaling the features can be improved. Last, this  
533 study only used a single method for downscaling. Using other downscaling approaches may  
534 result in increased accuracy and provide additional insights.

535 **Author Contributions:**

536 **EAE**-Conceptualization, methodology, formal analysis, validation, visualization, writing-  
537 original draft, **ZL**- Data acquisition, validation **ID**- Data acquisition, validation **SQ**-Funding  
538 acquisition, supervision, writing-review, editing.

539 **Funding:** This research was funded by the United States Department of Agriculture (USDA)  
540 under Grant AQD-109872.

541 **Acknowledgments:** The authors thank the anonymous reviewers for providing such valuable  
542 comments.

543 **Conflicts of Interest:** The authors declare no conflict of interest.

544





## 545 **References**

- 546 Abbaspour, K. C., E. Rouholahnejad, S. Vaghefi, R. Srinivasan, H. Yang, and B. Kløve, 2015: A  
547 continental-scale hydrology and water quality model for Europe: Calibration and uncertainty of a  
548 high-resolution large-scale SWAT model. *Journal of Hydrology*, **524**, 733–752,  
549 <https://doi.org/10.1016/j.jhydrol.2015.03.027>.
- 550 Abbaszadeh, P., H. Moradkhani, and X. Zhan, 2019: Downscaling SMAP Radiometer Soil Moisture Over  
551 the CONUS Using an Ensemble Learning Method. *Water Resources Research*, **55**, 324–344,  
552 <https://doi.org/10.1029/2018WR023354>.
- 553 Alemohammad, S. H., J. Kolassa, C. Prigent, F. Aires, and P. Gentile, 2018: Global downscaling of  
554 remotely sensed soil moisture using neural networks. *Hydrology and Earth System Sciences*, **22**,  
555 5341–5356, <https://doi.org/10.5194/hess-22-5341-2018>.
- 556 Ambrose, A. R., S. C. Sillett, and T. E. Dawson, 2009: Effects of tree height on branch hydraulics, leaf  
557 structure and gas exchange in California redwoods. *Plant, Cell & Environment*, **32**, 743–757,  
558 <https://doi.org/10.1111/j.1365-3040.2009.01950.x>.
- 559 Baldwin, D., K. J. Naithani, and H. Lin, 2017: Combined soil-terrain stratification for characterizing  
560 catchment-scale soil moisture variation. *Geoderma*, **285**, 260–269,  
561 <https://doi.org/10.1016/j.geoderma.2016.09.031>.
- 562 Balugani, E., M. Lubczynski, and K. Metselaar, 2014: A framework for sourcing of evaporation between  
563 saturated and unsaturated zone in bare soil condition. *Hydrological Sciences Journal*, **61**,  
564 150527103244004, <https://doi.org/10.1080/02626667.2014.966718>.
- 565 Bennie, J., B. Huntley, A. Wiltshire, M. Hill, and R. Baxter, 2008: Slope, aspect and climate: Spatially  
566 explicit and implicit models of topographic microclimate in chalk grassland. *Ecological*  
567 *Modelling*, **216**, 47–59, <https://doi.org/10.1016/j.ecolmodel.2008.04.010>.
- 568 Bond, B. J., F. C. Meinzer, and J. R. Brooks, 2008: How Trees Influence the Hydrological Cycle in Forest  
569 Ecosystems. *Hydroecology and Ecohydrology*, P.J. Wood, D.M. Hannah, and J.P. Sadler, Eds.,  
570 Wiley, 7–35.
- 571 Breiman, L., 2001: Random Forests. *Machine Learning*, **45**, 5–32,  
572 <https://doi.org/10.1023/A:1010933404324>.
- 573 Brocca, L., and Coauthors, 2014: Soil as a natural rain gauge: Estimating global rainfall from satellite soil  
574 moisture data. *Journal of Geophysical Research: Atmospheres*, **119**, 5128–5141,  
575 <https://doi.org/10.1002/2014JD021489>.
- 576 Carrijo, D. R., C. Li, S. J. Parikh, and B. A. Linquist, 2019: Irrigation management for arsenic mitigation  
577 in rice grain: Timing and severity of a single soil drying. *Science of The Total Environment*, **649**,  
578 300–307, <https://doi.org/10.1016/j.scitotenv.2018.08.216>.
- 579 Charpentier, M. A., and P. M. Groffman, 1992: Soil moisture variability within remote sensing pixels.  
580 *Journal of Geophysical Research: Atmospheres*, **97**, 18987–18995,  
581 <https://doi.org/10.1029/92JD00882>.



- 582 Chen, S., D. She, L. Zhang, M. Guo, and X. Liu, 2019: Spatial Downscaling Methods of Soil Moisture  
583 Based on Multisource Remote Sensing Data and Its Application. *Water*, **11**, 1401,  
584 <https://doi.org/10.3390/w11071401>.
- 585 Cosh, M., T. Jackson, and R. Bindlish, 2004: Watershed scale temporal and spatial stability of soil  
586 moisture and its role in validating satellite estimates. *Remote Sensing of Environment*, **92**, 427–  
587 435, <https://doi.org/10.1016/j.rse.2004.02.016>.
- 588 Crow, W. T., and Coauthors, 2012: Upscaling sparse ground-based soil moisture observations for the  
589 validation of coarse-resolution satellite soil moisture products. *Reviews of Geophysics*, **50**,  
590 <https://doi.org/10.1029/2011RG000372>.
- 591 Cutler, A., D. R. Cutler, and J. R. Stevens, 2012: Random Forests. *Ensemble Machine Learning: Methods*  
592 *and Applications*, C. Zhang and Y. Ma, Eds., Springer US, 157–175.
- 593 Daly, C., M. Halbleib, J. I. Smith, W. P. Gibson, M. K. Doggett, G. H. Taylor, J. Curtis, and P. P.  
594 Pasteris, 2008: Physiographically sensitive mapping of climatological temperature and  
595 precipitation across the conterminous United States. *International Journal of Climatology*, **28**,  
596 2031–2064, <https://doi.org/10.1002/joc.1688>.
- 597 Dobriyal, P., A. Qureshi, R. Badola, and S. A. Hussain, 2012: A review of the methods available for  
598 estimating soil moisture and its implications for water resource management. *Journal of*  
599 *Hydrology*, s **458–459**, 110–117, <https://doi.org/10.1016/j.jhydrol.2012.06.021>.
- 600 Engle, D., B. Coppedge, and S. Fuhlendorf, 2008: From the Dust Bowl to the Green Glacier: Human  
601 Activity and Environmental Change in Great Plains Grasslands. Vol. 196 of, 253–271.
- 602 Famiglietti, J. S., and Coauthors, 1999: Ground-based investigation of soil moisture variability within  
603 remote sensing footprints During the Southern Great Plains 1997 (SGP97) Hydrology  
604 Experiment. *Water Resources Research*, **35**, 1839–1851, <https://doi.org/10.1029/1999WR900047>.
- 605 Fang, B., V. Lakshmi, R. Bindlish, and T. J. Jackson, 2018: Downscaling of SMAP Soil Moisture Using  
606 Land Surface Temperature and Vegetation Data. *Vadose Zone Journal*, **17**, 170198,  
607 <https://doi.org/10.2136/vzj2017.11.0198>.
- 608 Ford, T. W., Q. Wang, and S. M. Quiring, 2016: The Observation Record Length Necessary to Generate  
609 Robust Soil Moisture Percentiles. *Journal of Applied Meteorology and Climatology*, **55**, 2131–  
610 2149, <https://doi.org/10.1175/JAMC-D-16-0143.1>.
- 611 Guevara, M., and R. Vargas, 2019: Downscaling satellite soil moisture using geomorphometry and  
612 machine learning. *PLoS ONE*, **14**, e0219639, <https://doi.org/10.1371/journal.pone.0219639>.
- 613 Huxman, T. E., and Coauthors, 2004: Precipitation pulses and carbon fluxes in semiarid and arid  
614 ecosystems. *Oecologia*, **141**, 254–268, <https://doi.org/10.1007/s00442-004-1682-4>.
- 615 I. D. Moore, G. J. Burch, and D. H. Mackenzie, 1988: Topographic Effects on the Distribution of Surface  
616 Soil Water and the Location of Ephemeral Gullies. *Transactions of the ASAE*, **31**, 1098–1107,  
617 <https://doi.org/10.13031/2013.30829>.

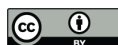

- 618 Im, J., S. Park, J. Rhee, J. Baik, and M. Choi, 2016: Downscaling of AMSR-E soil moisture with MODIS  
619 products using machine learning approaches. *Environ Earth Sci*, **75**, 1120,  
620 <https://doi.org/10.1007/s12665-016-5917-6>.
- 621 Jacobs, A. F. G., B. G. Heusinkveld, and S. M. Berkowicz, 2000: Dew measurements along a longitudinal  
622 sand dune transect, Negev Desert, Israel. *Int J Biometeorol*, **43**, 184–190,  
623 <https://doi.org/10.1007/s004840050007>.
- 624 Jacobs, J., 2004: SMEX02: Field scale variability, time stability and similarity of soil moisture. *Remote*  
625 *Sensing of Environment*, **92**, 436–446, <https://doi.org/10.1016/j.rse.2004.02.017>.
- 626 Jiang, H., and W. Cotton, 2004: Soil moisture estimation using an artificial neural network: A feasibility  
627 study. *Canadian Journal of Remote Sensing*, **30**, <https://doi.org/10.5589/m04-041>.
- 628 Joshi, C., and B. P. Mohanty, 2010: Physical controls of near-surface soil moisture across varying spatial  
629 scales in an agricultural landscape during SMEX02. *Water Resources Research*, **46**,  
630 2010WR009152, <https://doi.org/10.1029/2010WR009152>.
- 631 Keesstra, S. D., and Coauthors, 2016: The significance of soils and soil science towards realization of the  
632 United Nations Sustainable Development Goals. *SOIL*, **2**, 111–128, [https://doi.org/10.5194/soil-](https://doi.org/10.5194/soil-2-111-2016)  
633 2-111-2016.
- 634 Kim, C. P., J. N. M. Stricker, and R. A. Feddes, 1997: Impact of soil heterogeneity on the water budget of  
635 the unsaturated zone. *Water Resources Research*, **33**, 991–999,  
636 <https://doi.org/10.1029/97WR00364>.
- 637 Kim, G., and A. Barros, 2002: Downscaling of remotely sensed soil moisture with a modified fractal  
638 interpolation method using contraction mapping and ancillary data. *Remote Sensing of*  
639 *Environment*, **83**, 400–413, [https://doi.org/10.1016/S0034-4257\(02\)00044-5](https://doi.org/10.1016/S0034-4257(02)00044-5).
- 640 Kim, M., J. Im, H. Han, J. Kim, S. Lee, M. Shin, and H.-C. Kim, 2015: Landfast sea ice monitoring using  
641 multisensor fusion in the Antarctic. *GIScience & Remote Sensing*, **52**, 239–256,  
642 <https://doi.org/10.1080/15481603.2015.1026050>.
- 643 Krueger, E. S., T. E. Ochsner, and S. M. Quiring, 2019: Development and Evaluation of Soil Moisture-  
644 Based Indices for Agricultural Drought Monitoring. *Agronomy Journal*, **111**, 1392–1406,  
645 <https://doi.org/10.2134/agronj2018.09.0558>.
- 646 Kunkel, K. E., L. E. Stevens, S. E. Stevens, and L. Sun, Regional Climate Trends and Scenarios for the  
647 U.S. National Climate Assessment Part 4. Climate of the U.S. Great Plains.
- 648 Li, M., J. Im, and C. Beier, 2013: Machine learning approaches for forest classification and change  
649 analysis using multi-temporal Landsat TM images over Huntington Wildlife Forest. *GIScience &*  
650 *Remote Sensing*, **50**, 361–384, <https://doi.org/10.1080/15481603.2013.819161>.
- 651 Li, X., W. Chen, X. Cheng, and L. Wang, 2016: A Comparison of Machine Learning Algorithms for  
652 Mapping of Complex Surface-Mined and Agricultural Landscapes Using ZiYuan-3 Stereo  
653 Satellite Imagery. *Remote Sensing*, **8**, 514, <https://doi.org/10.3390/rs8060514>.



- 654 Liu, J., F. Rahmani, K. Lawson, and C. Shen, 2022: A multiscale deep learning model for soil moisture  
655 integrating satellite and in-situ data. *Geophysical Research Letters*, **n/a**, e2021GL096847,  
656 <https://doi.org/10.1029/2021GL096847>.
- 657 Liu, Q., and Coauthors, 2011: The Contributions of Precipitation and Soil Moisture Observations to the  
658 Skill of Soil Moisture Estimates in a Land Data Assimilation System. *Journal of*  
659 *Hydrometeorology*, **12**, 750–765.
- 660 Liu, Y., W. Jing, Q. Wang, and X. Xia, 2020: Generating high-resolution daily soil moisture by using  
661 spatial downscaling techniques: a comparison of six machine learning algorithms. *Advances in*  
662 *Water Resources*, **141**, 103601, <https://doi.org/10.1016/j.advwatres.2020.103601>.
- 663 Lu, Z., J. Im, J. Rhee, and M. Hodgson, 2014: Building type classification using spatial and landscape  
664 attributes derived from LiDAR remote sensing data. *Landscape and Urban Planning*, **130**, 134–  
665 148, <https://doi.org/10.1016/j.landurbplan.2014.07.005>.
- 666 Mohanty, B. P., and T. H. Skaggs, 2001: Spatio-temporal evolution and time-stable characteristics of soil  
667 moisture within remote sensing footprints with varying soil, slope, and vegetation. *Advances in*  
668 *Water Resources*, **24**, 1051–1067, [https://doi.org/10.1016/S0309-1708\(01\)00034-3](https://doi.org/10.1016/S0309-1708(01)00034-3).
- 669 Mohanty, B. P., T. H. Skaggs, and J. S. Famiglietti, 2000: Analysis and mapping of field-scale soil  
670 moisture variability using high-resolution, ground-based data during the Southern Great Plains  
671 1997 (SGP97) Hydrology Experiment. *Water Resources Research*, **36**, 1023–1031,  
672 <https://doi.org/10.1029/1999WR900360>.
- 673 Nielsen, M., B. I. Cook, K. Marvel, M. Ting, and J. E. Smerdon, 2024: The Changing Influence of  
674 Precipitation on Soil Moisture Drought With Warming in the Mediterranean and Western North  
675 America. *Earth's Future*, **12**, e2023EF003987, <https://doi.org/10.1029/2023EF003987>.
- 676 Oren, R., J. S. Sperry, G. G. Katul, D. E. Pataki, B. E. Ewers, N. Phillips, and K. V. R. Schäfer, 1999:  
677 Survey and synthesis of intra- and interspecific variation in stomatal sensitivity to vapour  
678 pressure deficit. *Plant, Cell & Environment*, **22**, 1515–1526, <https://doi.org/10.1046/j.1365-3040.1999.00513.x>.
- 680 Panciera, R., J. P. Walker, J. D. Kalma, E. J. Kim, J. M. Hacker, O. Merlin, M. Berger, and N. Skou,  
681 2008: The NAFE'05/CoSMOS Data Set: Toward SMOS Soil Moisture Retrieval, Downscaling,  
682 and Assimilation. *IEEE Trans. Geosci. Remote Sensing*, **46**, 736–745,  
683 <https://doi.org/10.1109/TGRS.2007.915403>.
- 684 Park, S., J. Im, E. Jang, and J. Rhee, 2016: Drought assessment and monitoring through blending of  
685 multi-sensor indices using machine learning approaches for different climate regions.  
686 *Agricultural and Forest Meteorology*, **216**, 157–169,  
687 <https://doi.org/10.1016/j.agrformet.2015.10.011>.
- 688 Peng, J., A. Loew, O. Merlin, and N. E. C. Verhoest, 2017: A review of spatial downscaling of satellite  
689 remotely sensed soil moisture: Downscale Satellite-Based Soil Moisture. *Rev. Geophys.*, **55**, 341–  
690 366, <https://doi.org/10.1002/2016RG000543>.
- 691 Pittelkow, C. M., and Coauthors, 2015: Productivity limits and potentials of the principles of conservation  
692 agriculture. *Nature*, **517**, 365–368, <https://doi.org/10.1038/nature13809>.



- 693 Rhee, J., S. Park, and Z. Lu, 2014: Relationship between land cover patterns and surface temperature in  
694 urban areas. *GIScience & Remote Sensing*, **51**, 521–536,  
695 <https://doi.org/10.1080/15481603.2014.964455>.
- 696 Robinson, D. A., and Coauthors, 2008: Soil Moisture Measurement for Ecological and Hydrological  
697 Watershed-Scale Observatories: A Review. *Vadose Zone Journal*, **7**, 358–389,  
698 <https://doi.org/10.2136/vzj2007.0143>.
- 699 Ruosteenoja, K., T. Markkanen, and J. Räisänen, 2020: Thermal seasons in northern Europe in projected  
700 future climate. *International Journal of Climatology*, **40**, 4444–4462,  
701 <https://doi.org/10.1002/joc.6466>.
- 702 Salvucci, G., 2001: Estimating the moisture dependence of root zone water loss using conditionally  
703 averaged precipitation. *Water Resources Research - WATER RESOUR RES*, **37**, 1357–1366,  
704 <https://doi.org/10.1029/2000WR900336>.
- 705 Seager, R., and Coauthors, 2007: Model Projections of an Imminent Transition to a More Arid Climate in  
706 Southwestern North America. *Science*, **316**, 1181–1184, <https://doi.org/10.1126/science.1139601>.
- 707 —, A. Tzanova, and J. Nakamura, 2009: Drought in the Southeastern United States: Causes, Variability  
708 over the Last Millennium, and the Potential for Future Hydroclimate Change.  
709 <https://doi.org/10.1175/2009JCLI2683.1>.
- 710 Seneviratne, S. I., T. Corti, E. L. Davin, M. Hirschi, E. B. Jaeger, I. Lehner, B. Orlowsky, and A. J.  
711 Teuling, 2010: Investigating soil moisture–climate interactions in a changing climate: A review.  
712 *Earth-Science Reviews*, **99**, 125–161, <https://doi.org/10.1016/j.earscirev.2010.02.004>.
- 713 Sivapalan, M., K. Beven, and E. F. Wood, 1987: On hydrologic similarity: 2. A scaled model of storm  
714 runoff production. *Water Resources Research*, **23**, 2266–2278,  
715 <https://doi.org/10.1029/WR023i012p02266>.
- 716 Srivastava, P. K., D. Han, M. R. Ramirez, and T. Islam, 2013: Machine Learning Techniques for  
717 Downscaling SMOS Satellite Soil Moisture Using MODIS Land Surface Temperature for  
718 Hydrological Application. *Water Resour Manage*, **27**, 3127–3144,  
719 <https://doi.org/10.1007/s11269-013-0337-9>.
- 720 Sun, H., and Y. Cui, 2021: Evaluating Downscaling Factors of Microwave Satellite Soil Moisture Based  
721 on Machine Learning Method. *Remote Sensing*, **13**, 133, <https://doi.org/10.3390/rs13010133>.
- 722 Vereecken, H., J. A. Huisman, H. Bogaen, J. Vanderborght, J. A. Vrugt, and J. W. Hopmans, 2008: On  
723 the value of soil moisture measurements in vadose zone hydrology: A review. *Water Resources*  
724 *Research*, **44**, <https://doi.org/10.1029/2008WR006829>.
- 725 Wagner, W., and Coauthors, 2013: The ASCAT Soil Moisture Product: A Review of its Specifications,  
726 Validation Results, and Emerging Applications. *Meteorologische Zeitschrift*, **22**, 5–33,  
727 <https://doi.org/10.1127/0941-2948/2013/0399>.
- 728 Wanders, N., D. Karssenber, A. de Roo, S. M. de Jong, and M. F. P. Bierkens, 2014: The suitability of  
729 remotely sensed soil moisture for improving operational flood forecasting. *Hydrol. Earth Syst.*  
730 *Sci.*, **18**, 2343–2357, <https://doi.org/10.5194/hess-18-2343-2014>.



- 731 Warner, D., M. Guevara, J. Callahan, and R. Vargas, 2021: Downscaling satellite soil moisture for  
732 landscape applications: A case study in Delaware, USA. *Journal of Hydrology: Regional Studies*,  
733 **38**, 100946, <https://doi.org/10.1016/j.ejrh.2021.100946>.
- 734 Xu, M., N. Yao, H. Yang, J. Xu, A. Hu, L. Goncalves, and G. Liu, 2022: Downscaling SMAP soil  
735 moisture using a Wide & Deep learning method over the Continental United States. *Journal of*  
736 *Hydrology*, **609**, 127784, <https://doi.org/10.1016/j.jhydrol.2022.127784>.
- 737 Xu, W., Z. Zhang, Z. Long, and Q. Qin, 2021: Downscaling SMAP Soil Moisture Products With  
738 Convolutional Neural Network. *IEEE Journal of Selected Topics in Applied Earth Observations*  
739 *and Remote Sensing*, **14**, 4051–4062, <https://doi.org/10.1109/JSTARS.2021.3069774>.
- 740 Zhang, N., S. M. Quiring, and T. W. Ford, 2019: *Blending SMAP, Noah and In Situ Soil Moisture Using*  
741 *Multiple Methods*. Vadose Zone Hydrology/Modelling approaches,.
- 742 Zhao, W., N. Sánchez, H. Lu, and A. Li, 2018: A spatial downscaling approach for the SMAP passive  
743 surface soil moisture product using random forest regression. *Journal of Hydrology*, **563**, 1009–  
744 1024, <https://doi.org/10.1016/j.jhydrol.2018.06.081>.
- 745 Zhou, X., H. S. Lin, and E. A. White, 2008: Surface soil hydraulic properties in four soil series under  
746 different land uses and their temporal changes. *CATENA*, **73**, 180–188,  
747 <https://doi.org/10.1016/j.catena.2007.09.009>.
- 748 Dew - Monteith - 1957 - Quarterly Journal of the Royal Meteorological Society - Wiley Online Library.  
749 <https://rmets.onlinelibrary.wiley.com/doi/10.1002/qj.49708335706> (Accessed June 6, 2024).

750
